# Supplementary material
Source: HighWire-hosted journal article supplement (doi:10.1101/rna.080310.124)
Supplement: Supplemental_Figure_Legends.docx [file Supplemental_Figure_Legends.docx]

**Supplemental Figure Legends**

**Figure S1:** **Control experiments for eIF3 RNA Bind-n-Seq** **a)** Commassie blue-stained tris-glycine gel of purified eIF3 with indicated subunits. The major contaminant observed is eIF5. **b)** Purified eIF3 restores translational activity to heat-inactivated extracts from *prt1-1* mutant yeast. Reported are the relative luciferase activities of eIF3 heat sensitive (*prt1-1*) and isogenic (*PRT1*) yeast extracts supplemented with either 100 nM purified eIF3 in storage buffer (+eIF3) or equal volume of storage buffer (+Buffer). Replicates indicate independently prepared extracts. Bars represent the average of 3 technical replicates and error bars represent standard deviation. **c)** RBNS is reproducible for all libraries. Shown are the bound reads for libraries at 0, 19, 55, 500, and 1500 nM eIF3, as well as the reads for the input libraries. **d)** Enrichment of top 10 binders in 0 nM libraries traced across all libraries. The gradual decrease in eIF3 enrichment score with increased eIF3 concentration is consistent with constant background binding with increasing amount of specifically bound RNA (Lambert et al., 2014).

**Figure S2**: **eIF3 enrichment score is predictive of eIF3 binding affinity.** Increasing amounts of eIF3 were bound with 32P-labeled 5′-UTRs from **(a)** *YDR177W*, **(b)** *YDR495C*, **(c)** *YNR034W−A*, **(d)** *YBR255C−A*, **(e)** *YDL099W*, **(f)** *YER143W*, **(g)** *YDR162C*, **(h)** *YEL070W*, **(i)** *YOR092W*, **(j)** *YCR054C*, **(k)** *YPR016C* or **(l)** *YER069W*. 5′-UTRs in **(a-g)** represent binders in the RBNS assay (eIF3 enrichment > 1.59) and **(h-l)** represent non-binders. Apparent dissociation constant calculated from non-linear regression using Hill’s equation in Origin is indicated together with the obtained eIF3 enrichment score.

**Figure S3: eIF3 preferentially recognizes AMAYAA motifs in unstructured regions.** Sequence motifs identified by DREME (Bailey et al., 2015) in **(a)** 55 nM, **(b)** 166 nM or **(c)** 500 nM as overrepresented among bound 5′-UTRs. E-value represent Fisher’s exact test p-value for a given motif multiplied by number of motifs tested. Only motifs with e-value < 0.05 are shown. Distribution of observed enrichment in 166 nM library is shown for motifs **(d)** ASSAAM, **(e)** YAAYAA, **(f)** TATAKA, **(g)** ATAHTA, **(h)** ATWTTAA, or **(i)** TCTWCMT**(j)** eIF3 filter binding assay of YCR054C with one AMAYAA motif (grey) or two AMAYAA motifs (red). Kd is the best extrapolated estimate, assuming maximum fraction of bound RNA for both variants is equal.

**Figure S4:** **eIF3 binding and AMAYAA motifs enhance ribosome recruitment in vivo a)** 5′-UTR isoforms from hundreds of genes show differential binding to eIF3. Differential eIF3 enrichment for short and long isoform is plotted together with Bonferroni corrected p-values (t-test). Significant differences padj < 0.05 are depicted in red. **b)** eIF3 enrichment in 55 and 500 nM libraries is correlated with ribosome densities. c) Translation activity of alternative 5′-UTR isoforms with different numbers of AMAYAA motifs in unstarved conditions (left) and during glucose starvation (right). eIF3 binding is associated with increased ribosomal densities across multiple datasets in **(d)** wild type or pseudo-wild type and in **(g)** eIF3 DDKK mutant cells. eIF3 depletion leads to > 80 % decrease in translation in **(e)** eIF3 degron or **(f)** DDKK mutant cells as estimated from the change of polysome/monosome (P/M) ratio. **(h)** The AMAYAA motif is associated with increased ribosome density in 5′-UTRs without uORFs. In 5′-UTRs with multiple uORFs, the AMAYAA motif is associated with decreased ribosome density. **b, d, g, h)** Depicted are the log2-transformed values of ribosome densities.
