# Supplementary material
Source: HighWire-hosted journal article supplement (doi:10.1101/rna.080310.124)
Supplement: Supplemental_Table_Legends.docx [file Supplemental_Table_Legends.docx]

**Table S1:** eIF3 enrichment scores (sample rpm/ input pm) across RBNS libraries. “ID” is the unique identifier of a given 5′-UTR based on its genomic origin and UTR size, “avr_$$nM” is the enrichment score at given $$ concentration, sequence is the tested 5′-UTR sequence (DNA nomenclature), “folding energy” is the calculated energy of folding of the 5′-UTR, “AMAYAA” represents how many AMAYAA motifs were found within the tested sequence and “bound” describes with “1” whether the 5′-UTR was classified as binding eIF3.

**Table S2:** Pairwise comparisons of 5′-UTR isoforms. “TL_1” and “TL_2” contains the IDs of compared isoforms (TL, transcript leader, synonym for 5′-UTR), “enrichment_long” and “enrichment_short” eIF3 enrichment score for TL_1 and TL_2, respectively, “p_value” is the p-value of t-test, adjusted for multiple comparisons.

**Table S3:** Comparison of eIF3 binding and ribosome densities. “ID” is the unique RBNS ID, “UTR_size” the length of the dominant 5′-UTR, “AMAYAA” the number of detected AMAYAA motifs within the UTR, “eIF3_binding” classifies whether the RNA passed the eIF3 enrichment threshold, columns “Weinberg_TE”, “degron_WT_TE_, “degron_TE”, “DDKK_WT_TE”, and “DDKK_TE”, the recorded ribosome densities within the gene across different experiments.
